# Supplementary material for: Effect of defects on ballistic transport in a bilayer SnS2-based junction with Co intercalated electrodes
Source: Royal Society of Chemistry journal article supplement (doi:10.1039/d4cp03605k), 2025-01-01
Supplement: d4cp03605k1.pdf [file d4cp03605k1.pdf]

## Supplementary Information

# Effect of defects on ballistic transport in a bilayer SnS<sub>2</sub> based junction with Co intercalated electrodes

Miao Liu<sup>1</sup>, Huan Wang<sup>1,2§</sup>, Xiaojie Liu<sup>1#</sup>, Yin Wang<sup>3±</sup> and Haitao Yin<sup>1\*</sup>

1. Key Laboratory for Photonic and Electronic Bandgap Materials of Ministry of Education, School of Physics and Electronic Engineerin, Harbin Normal University, Harbin, 150025, China
2. College of Science, Qiqihar University, Qiqihar, 161006, China
3. Department of Physics and International Centre for Quantum and Molecular Structures, Shanghai University, Shanghai, 200444, China

Figure S1 presents the band structure of a double-layer SnS<sub>2</sub> with a cobalt atom intercalated, featuring lattice constants of  $7\mathbf{a}\times 2\mathbf{b}$ . As observed in the figure, all impurity levels are situated below the Fermi level. Moreover, the impurity states closest to the Fermi level exhibit flat bands, indicating more localized characteristics.

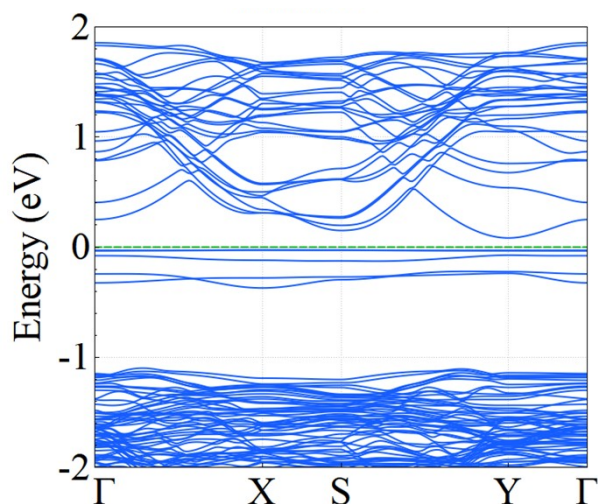

**Figure S1** Band structure of double-layer SnS<sub>2</sub> with a cobalt atom intercalation.

---

\*Corresponding author: \* wlyht@126.com (Haitao Yin) §lixueyuanwh@163.com (Huan Wang); # redlxj@126.com(Xiaojie Liu); ± yinwang@shu.edu.cn (Yin Wang).

To further investigate the influence of defect concentration on the characteristics and transport properties of the junction, we here consider half the defect concentration mentioned in the main text. Figure S2 presents the projected density of states (PDOS) and transmission spectra with the defect located at the center of the scattering region. It is evident from the PDOS that the defect concentration has a minimal impact on the potential barrier  $\Phi$ . However, it significantly affects the transmission, with a lower concentration resulting in reduced tunneling.

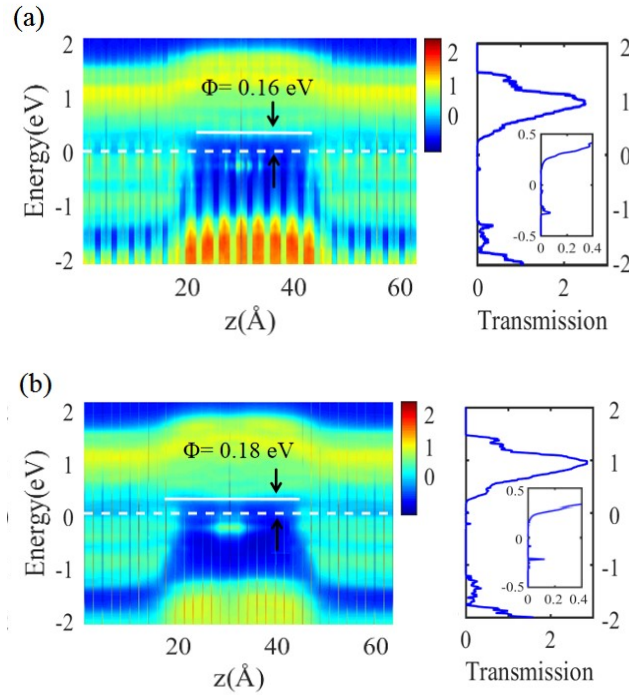

**Figure S2** PDOS and transmission coefficient in equilibrium state. (a) f-AC; (b) ZZ. The values of PDOS are represented in various colors on a logarithmic scale. The white dashed lines represent Fermi levels. The barrier height is denoted by  $\Phi$ . The defect concentration here is lower, specifically half, compared to the reference point in the main text.
